# Supplementary material for: Hyperchloremia, not Concomitant Hypernatremia, Independently Predicts Early Mortality in Critically Ill Moderate–Severe Traumatic Brain Injury Patients
Source: Springer Nature journal article supplement (doi:10.1007/s12028-020-00928-0), 2020-02-10
Supplement: MOESM2 [file 17666544]

**Supplemental Table 2a: Adjusted model for in-hospital mortality including TWA sodium values only**

Shown is the multivariable model for in-hospital mortality (n=416a, with 193 in-hospital deaths) with time-weighted average sodium values in the multivariable model. For this model: C-statistic=0.96 (corrected for optimism after bootstrap validation: 0.95); Hosmer-Lemeshow goodness-of-fit p-value < 0.0001.

Abbreviations: Acute kidney injury (AKI), computed tomography (CT), epidural hemorrhage (EDH), Glasgow coma scale (GCS), subarachnoid hemorrhage (SAH), time-weighted average (TWA), Intensive care unit (ICU), Length of stay (LOS)

| **Risk Factor** | **OR (95% CI)** |
| --- | --- |
| Age per 1 year change | 1.05 (1.03-1.07) |
| Motor GCS 1 vs 6 | 3.7 (0.86-16) |
| Motor GCS 2 vs 6 | 5.4 (0.69-43) |
| Motor GCS 3 vs 6 | 4 (0.35-46) |
| Motor GCS 4 vs 6 | 2.8 (0.59-13) |
| Motor GCS 5 vs 6 | 1.7 (0.37-7.4) |
| Duration of mechanical ventilation | 1.3 (1.1-1.5) |
| ICU LOS | 0.68 (0.59-0.77) |
| Pre-hospital hypoxia | 1.1 (0.29-4) |
| Pupils None vs Both | 4.4 (1.6-12) |
| Pupils One vs Both | 1.02 (0.33-3.1) |
| Pre-hospital hypotension | 5.9 (1.5-23) |
| Marshall CT-classification III vs II | 4.4 (1.2-16) |
| Marshall CT-classification IV vs II | 1.7 (0.24-12) |
| Marshall CT-classification non-Evacuated mass lesion vs II | 4.8 (1.9-12) |
| Presence of SAH | 2.4 (1.03-5.5) |
| Presence of EDH | 0.17 (0.02-1.3) |
| Osmotic therapy given | 1.8 (0.76-4.1) |
| AKI | 3.8 (1.6-9.2) |
| TWA sodium per 10 mmol/L change | 4 (2.1-7.5) |

a Data were missing for 42 patients (35 were missing number of days mechanically ventilated, and 7 were missing sodium values)

**Supplemental Table 2b: Adjusted model for in-hospital mortality including TWA chloride values only**

Shown is the multivariable model for in-hospital mortality (n=405a, with 187 in-hospital deaths) with time-weighted average chloride values in the multivariable model. For this model: c-statistic=0.96 (corrected for optimism after bootstrap validation: 0.95); Hosmer-Lemeshow goodness-of-fit p-value < 0.0001.

Abbreviations: Acute kidney injury (AKI), computed tomography (CT), epidural hemorrhage (EDH), Glasgow coma scale (GCS), subarachnoid hemorrhage (SAH), time-weighted average (TWA), Intensive care unit (ICU), Length of stay (LOS)

| **Risk Factor** | **OR (95% CI)** |
| --- | --- |
| Age per 1 year change | 1.05 (1.03-1.08) |
| Motor GCS 1 vs 6 | 3.2 (0.72-14) |
| Motor GCS 2 vs 6 | 5.4 (0.69-43) |
| Motor GCS 3 vs 6 | 2.6 (0.19-37) |
| Motor GCS 4 vs 6 | 2.8 (0.56-14) |
| Motor GCS 5 vs 6 | 1.5 (0.34-7) |
| Duration of mechanical ventilation | 1.3 (1.1-1.4) |
| ICU LOS | 0.7 (0.62-0.8) |
| Pre-hospital hypoxia | 1.4 (0.37-5.5) |
| Pupils None vs Both | 3.4 (1.2-9.7) |
| Pupils One vs Both | 0.83 (0.26-2.6) |
| Pre-hospital hypotension | 4.3 (1.02-18) |
| Marshall CT-classification III vs II | 3.4 (0.85-13) |
| Marshall CT-classification IV vs II | 2.7 (0.27-28) |
| Marshall CT-classification non-Evacuated mass lesion vs II | 4.6 (1.8-12) |
| Presence of SAH | 2.1 (0.9-5) |
| Presence of EDH | 0.19 (0.02-1.4) |
| Osmotic therapy given | 1.8 (0.76-4.2) |
| AKI | 3.6 (1.5-8.8) |
| TWA chloride per 10 mmol/L change | 3.9 (2.2-7.1) |

a Data were missing for 53 patients (35 were missing number of days mechanically ventilated, and 18 were missing chloride values)
