# Supplementary material for: Hyperchloremia, not Concomitant Hypernatremia, Independently Predicts Early Mortality in Critically Ill Moderate–Severe Traumatic Brain Injury Patients
Source: Springer Nature journal article supplement (doi:10.1007/s12028-020-00928-0), 2020-02-10
Supplement: MOESM4 [file 17666544]

**Supplemental Table 4: Detailed description and results of the bootstrap validation**

| We internally validated our three models using bootstrapping with 100 bootstrap samples.We corrected the C-statistic of each model based on our fit of the bootstrap samples and the original data in the trained models. We report the optimistic C-statistic, which is the C-statistic of the final model, the optimism correction value, which is the mean of the difference between the C-statistic of each of the 100 training models applied to the original data and each bootstrap sample (22). The optimism corrected C-statistic is the bootstrap validated estimate of the C-statistic.  For the model including TWA Na:   | **Optimistic** C-statistic | **Optimism Correction** | **Corrected** C-statistic | | --- | --- | --- | | 0.962708 | 0.014409 | 0.9483 |     For the model including TWA Cl:   | **Optimistic** C-statistic | **Optimism Correction** | **Corrected** C-statistic | | --- | --- | --- | | 0.961414 | 0.015616 | 0.945798 |   For the model including TWA Na and Cl:   | **Optimistic** C-statistic | **Optimism Correction** | **Corrected** C-statistic | | --- | --- | --- | | 0.962044 | 0.016805 | 0.945238 |   We obtained these estimates using an edited version of the SAS macro %bval, written by Mithat Gönen (24). |
| --- | --- | --- | --- | --- | --- | --- | --- | --- | --- | --- | --- | --- | --- | --- | --- | --- | --- | --- |
